# Supplementary material for: Plasma-Based Proteomics Profiling of Patients with Hyperthyroidism after Antithyroid Treatment
Source: MDPI journal article supplement (doi:10.3390/molecules25122831), 2020-06-19
Supplement: s1 [file s1]

## Spots

| Spot No | Anova (p) | Fold | Average Normalised Volumes |             |
|---------|-----------|------|----------------------------|-------------|
|         |           |      | EUTH                       | HYPER       |
| 849     | 0.021     | 1.5  | 8.031 e+005                | 1.202 e+006 |
| 835     | 0.025     | 1.5  | 7.414 e+005                | 1.112 e+006 |
| 776     | 0.039     | 1.7  | 1.307 e+006                | 7.682 e+005 |
| 965     | 0.047     | 1.5  | 1.024 e+006                | 6.828 e+005 |
| 763     | 0.050     | 1.5  | 1.248 e+006                | 8.310 e+005 |
| 674     | 0.012     | 1.5  | 7.574 e+005                | 1.136 e+006 |
| 348     | 0.016     | 1.8  | 1.760 e+006                | 9.561 e+005 |
| 435     | 0.051     | 1.7  | 1.370 e+006                | 8.080 e+005 |
| 1097    | 0.050     | 1.5  | 7.673 e+006                | 5.115 e+006 |
| 966     | 0.050     | 1.5  | 1.005 e+007                | 1.509 e+007 |
| 855     | 0.050     | 1.5  | 8.126 e+006                | 1.219 e+007 |
| 425     | 0.050     | 1.5  | 4.062 e+005                | 6.092 e+005 |
| 1149    | 0.011     | 1.7  | 1.361 e+007                | 2.302 e+007 |
| 729     | 0.012     | 1.5  | 1.254 e+007                | 1.888 e+007 |
| 1153    | 0.012     | 1.5  | 1.582 e+007                | 2.383 e+007 |
| 560     | 0.039     | 1.5  | 1.730 e+006                | 1.153 e+006 |
| 1339    | 0.016     | 1.5  | 7.683 e+005                | 1.152 e+006 |
| 1591    | 0.037     | 1.5  | 1.034 e+006                | 1.543 e+006 |
| 958     | 0.053     | 1.5  | 7.202 e+005                | 1.081 e+006 |
| 780     | 0.027     | 1.8  | 5.983 e+005                | 3.400 e+005 |
